# Supplementary material for: Hydrogen Bonding and Polymorphism of Amino Alcohol Salts with Quinaldinate: Structural Study
Source: MDPI journal article supplement (doi:10.3390/molecules27030996), 2022-02-01

Supplementary materials for

**Hydrogen bonding and polymorphism of amino alcohol salts with quinaldinate:  
Structural study**

Nina Podjed, Barbara Modec\*

Faculty of Chemistry and Chemical Technology, University of Ljubljana, Večna pot 113  
1000 Ljubljana, Slovenia

\* Corresponding author. E-mail: [barbara.modec@fkkt.uni-lj.si](mailto:barbara.modec@fkkt.uni-lj.si)

## Abbreviations

|                        |                                        |
|------------------------|----------------------------------------|
| <b>1</b>               | (3a1pOHH)quin                          |
| <b>2</b>               | (2a1bOHH)quin                          |
| <b>3</b>               | (2a2m1pOHH)quin                        |
| quin <sup>-</sup>      | anion of quinaldinic acid              |
| 3a1pOHH <sup>+</sup>   | protonated 3-amino-1-propanol          |
| 2a1bOHH <sup>+</sup>   | protonated 2-amino-1-butanol           |
| 2a2m1pOHH <sup>+</sup> | protonated 2-amino-2-methyl-1-propanol |

**2a** and **2b** are polymorphs of **2**, **3a** and **3b** are polymorphs of **3**.

## 1. Powder X-ray diffraction patterns

**Figure S1.** Comparison of the calculated powder pattern for **1** with the measured PXRD pattern of the product of the direct reaction between 3-amino-1-propanol and quinaldinic acid.

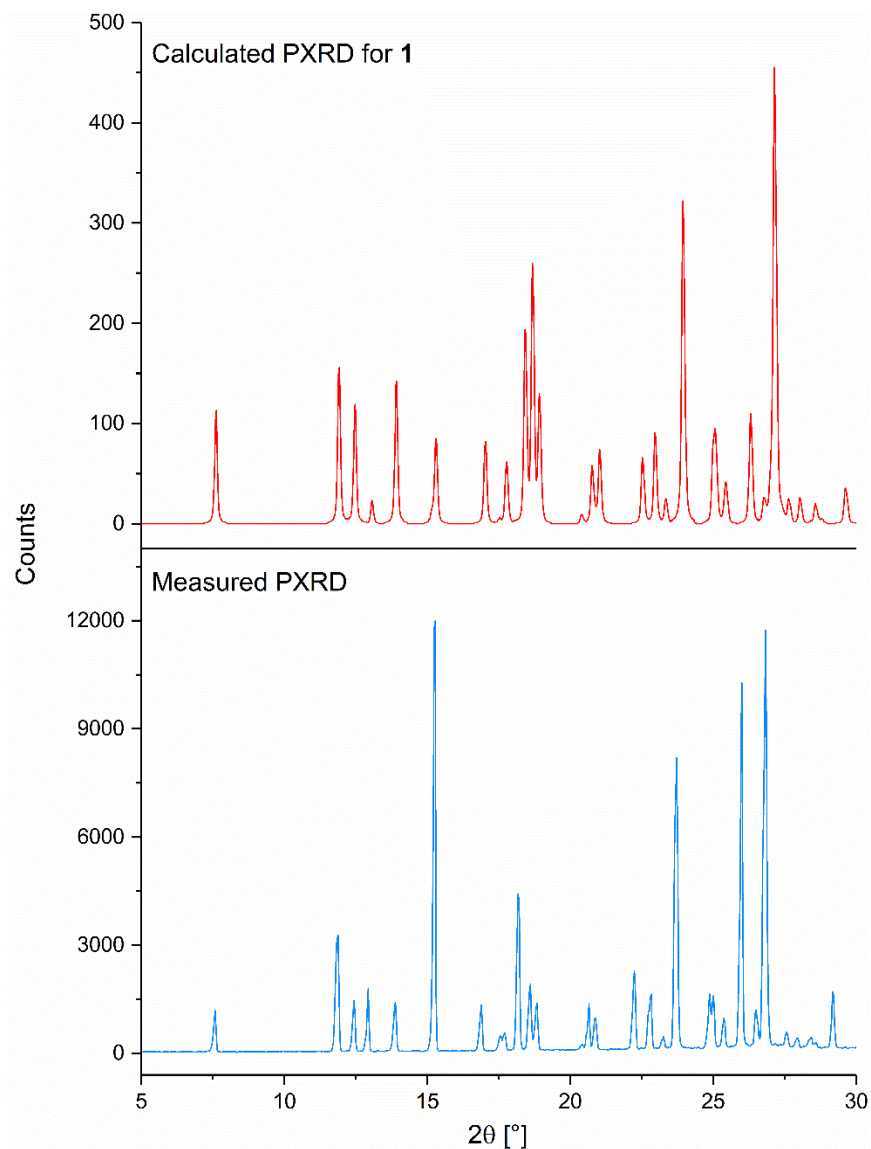

**Figure S2.** Comparison of the calculated powder patterns for **2a** and **2b** polymorphs with the measured PXRD pattern of the product of the direct reaction between 2-amino-1-butanol and quinaldinic acid.

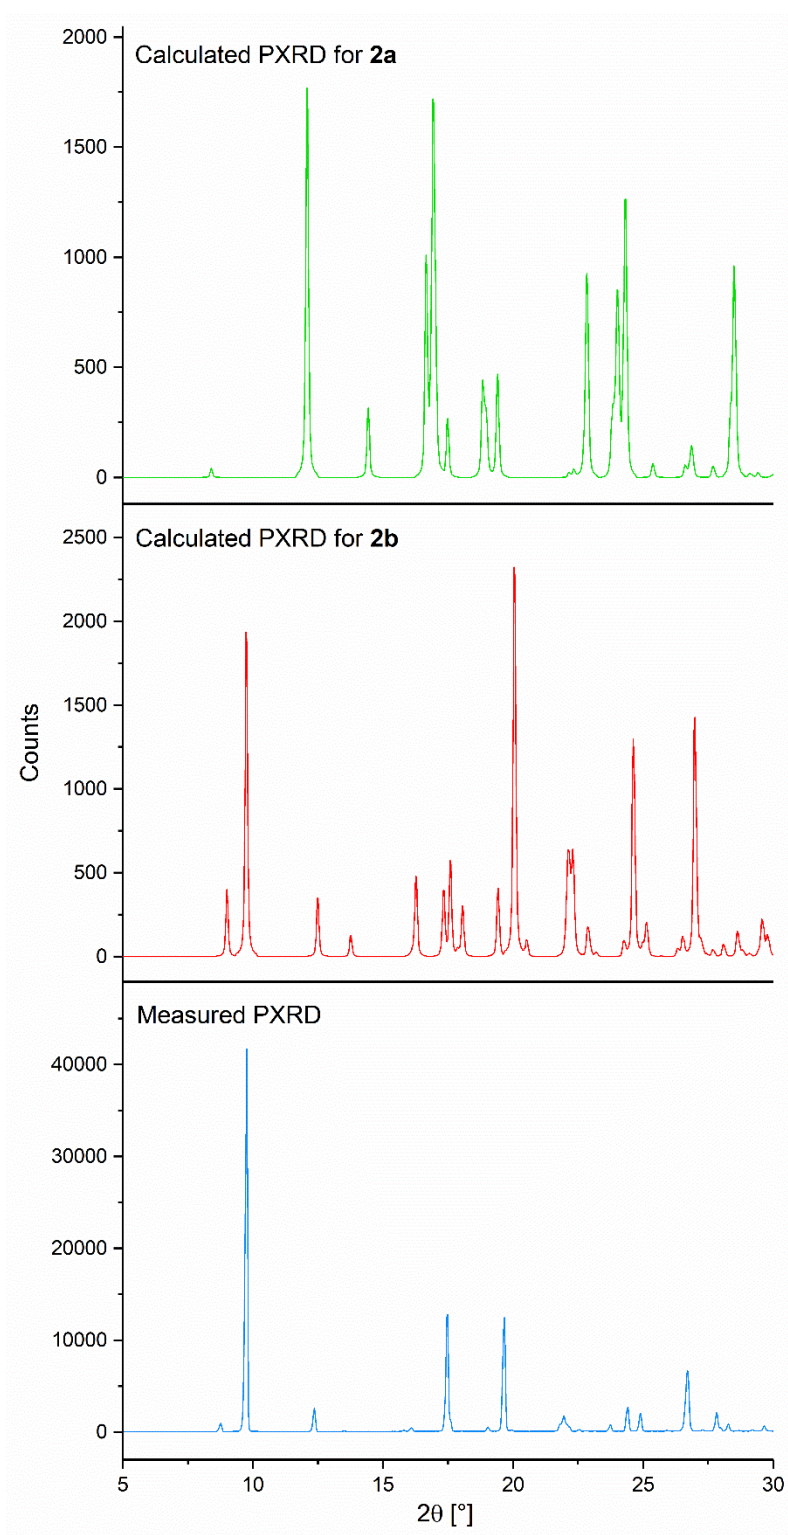

**Figure S3.** Comparison of the calculated powder patterns for **3a** and **3b** polymorphs with the measured PXRD pattern of the product of the direct reaction between 2-amino-2-methyl-1-propanol and quinaldinic acid.

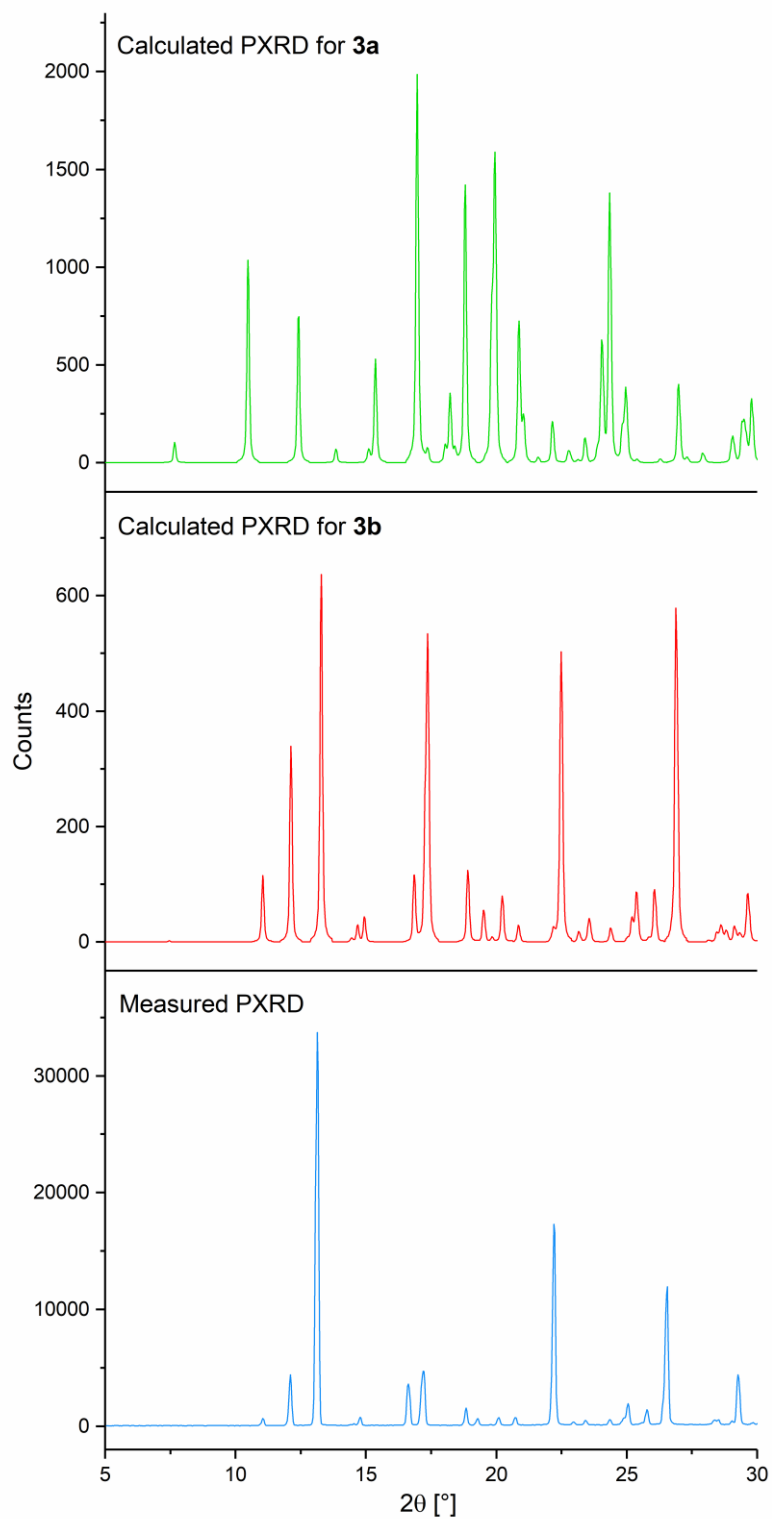

## 2. Packing diagrams

**Figure S4.** Stacking of layers in **1**: a view along one (top) or two (bottom) layers. From these two projections,  $\pi\cdots\pi$  stacking interactions occurring between quinaldinate anions from adjacent layers may be seen.

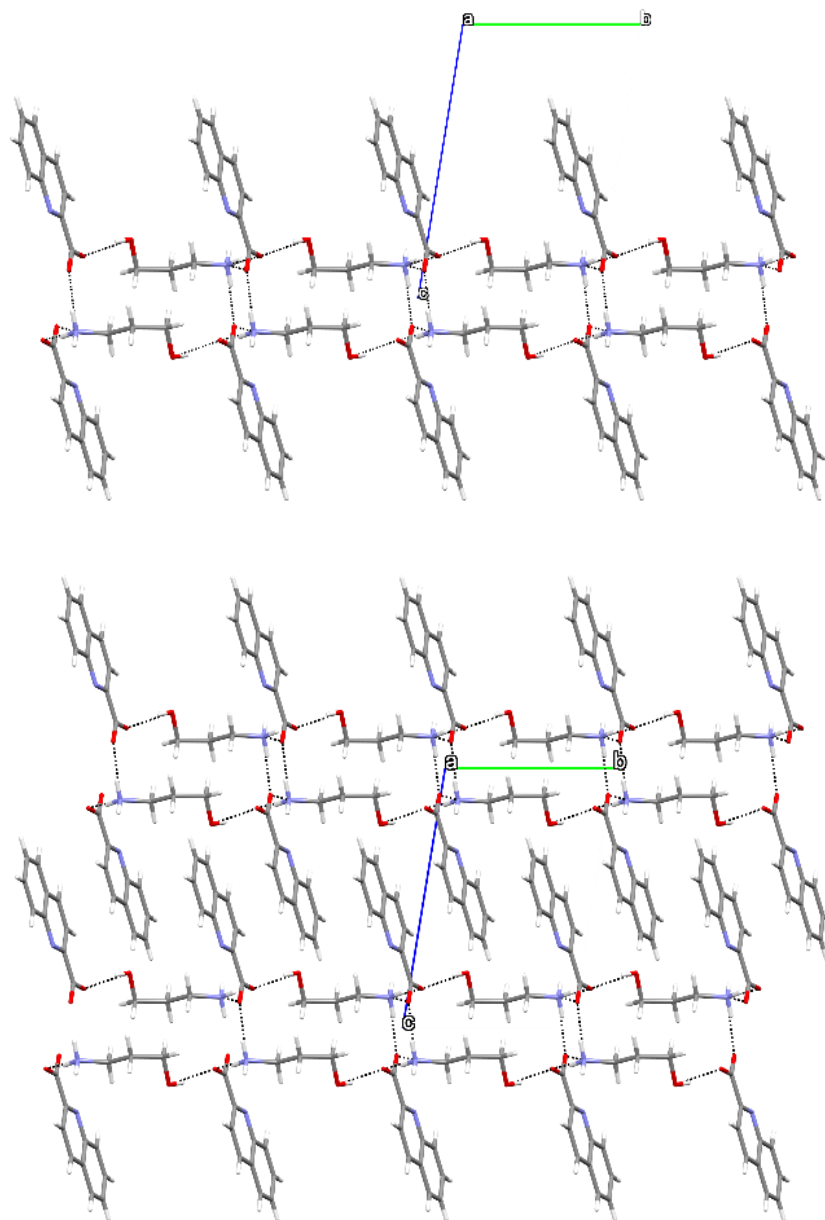

**Figure S5.** A view along one layer (top) or two layers (bottom) in **2a**. From these two projections,  $\pi\cdots\pi$  stacking interactions occurring between quinaldinate from adjacent layers may be seen.

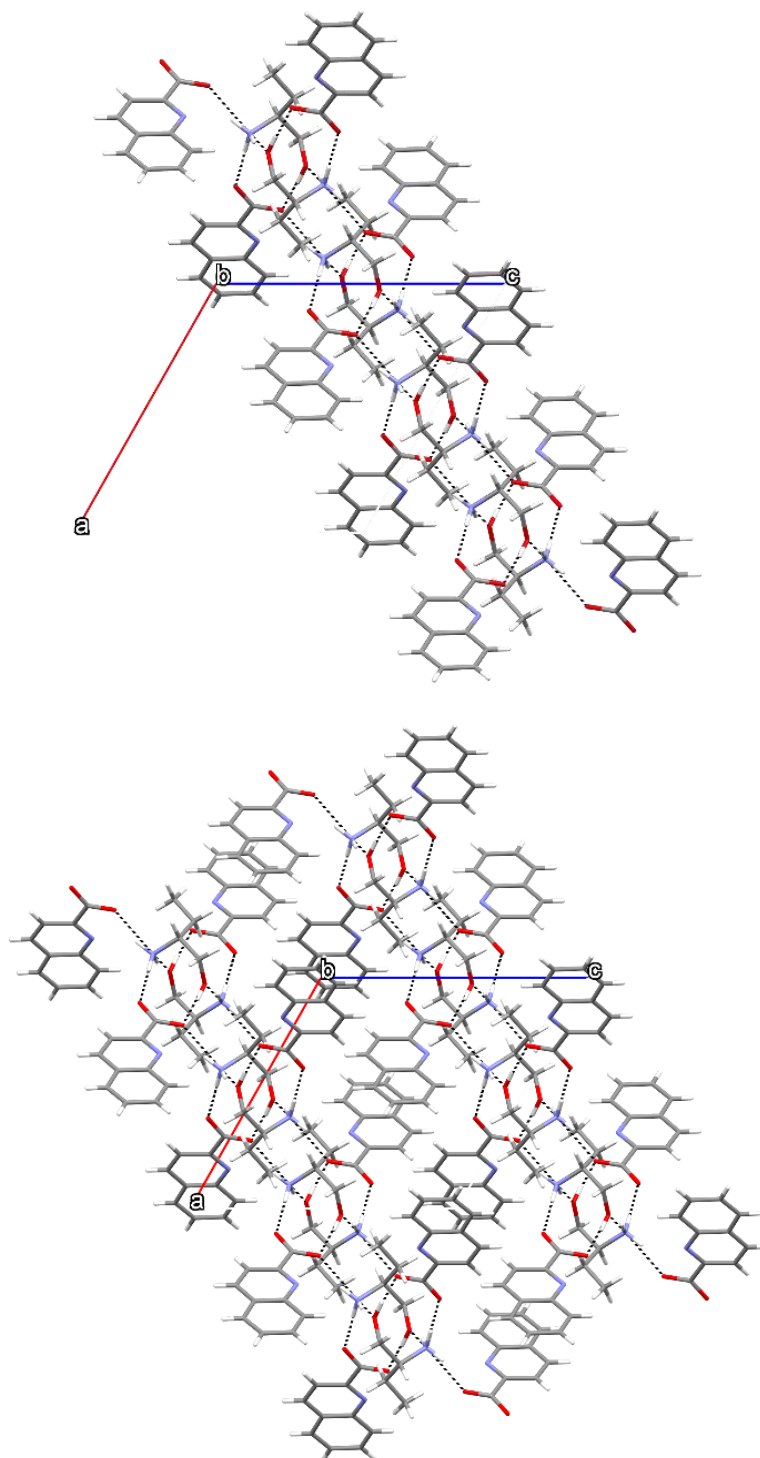

**Figure S6.** A view along one (top) or three (bottom) chains in the **3b** polymorph. From these two projections,  $\pi\cdots\pi$  stacking interactions occurring between quinaldinates from adjacent chains may be seen.

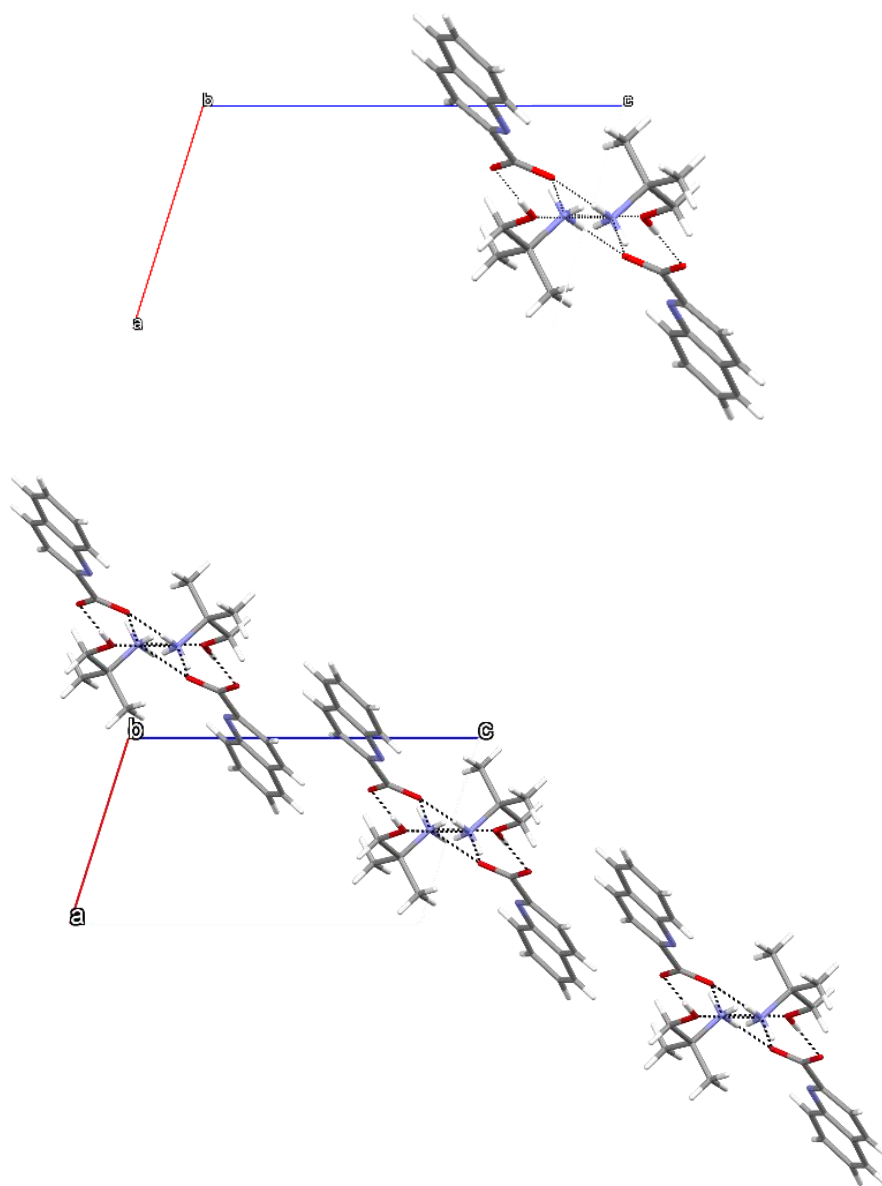



### 3. IR spectra

Figure S7. IR spectrum of **1**.

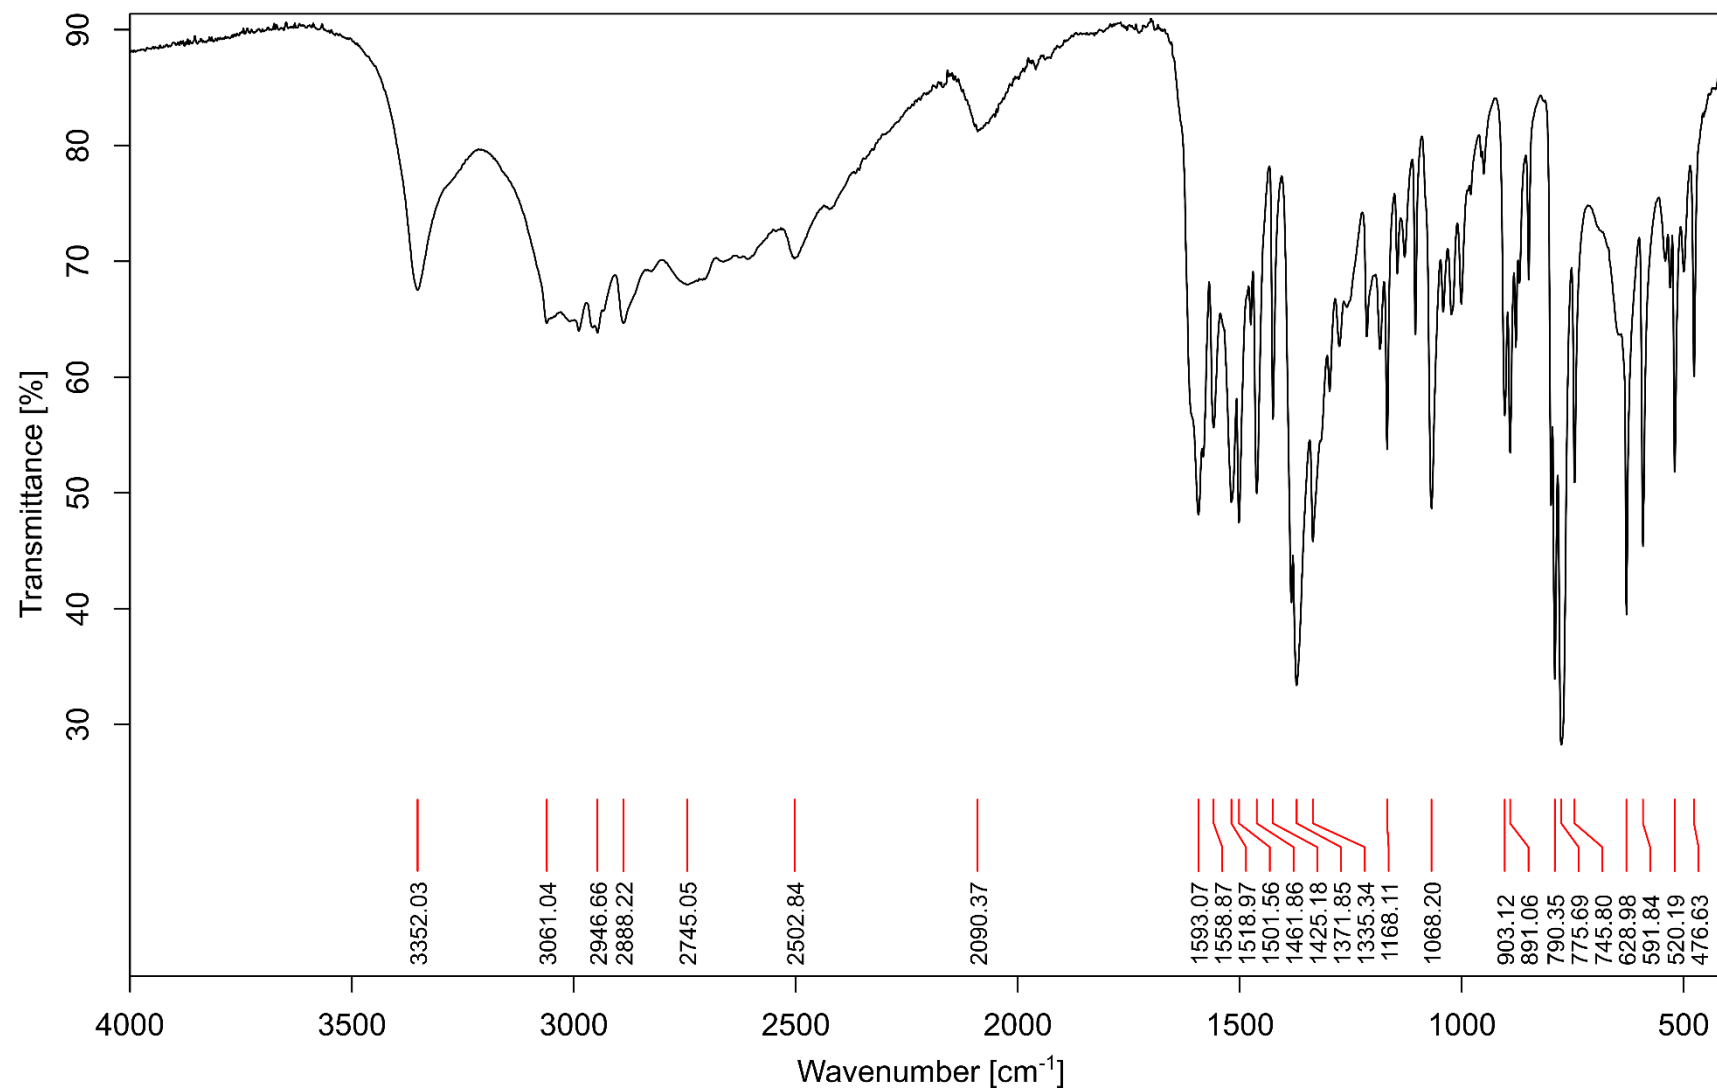

**Figure S8.** IR spectrum of the **2a** polymorph.

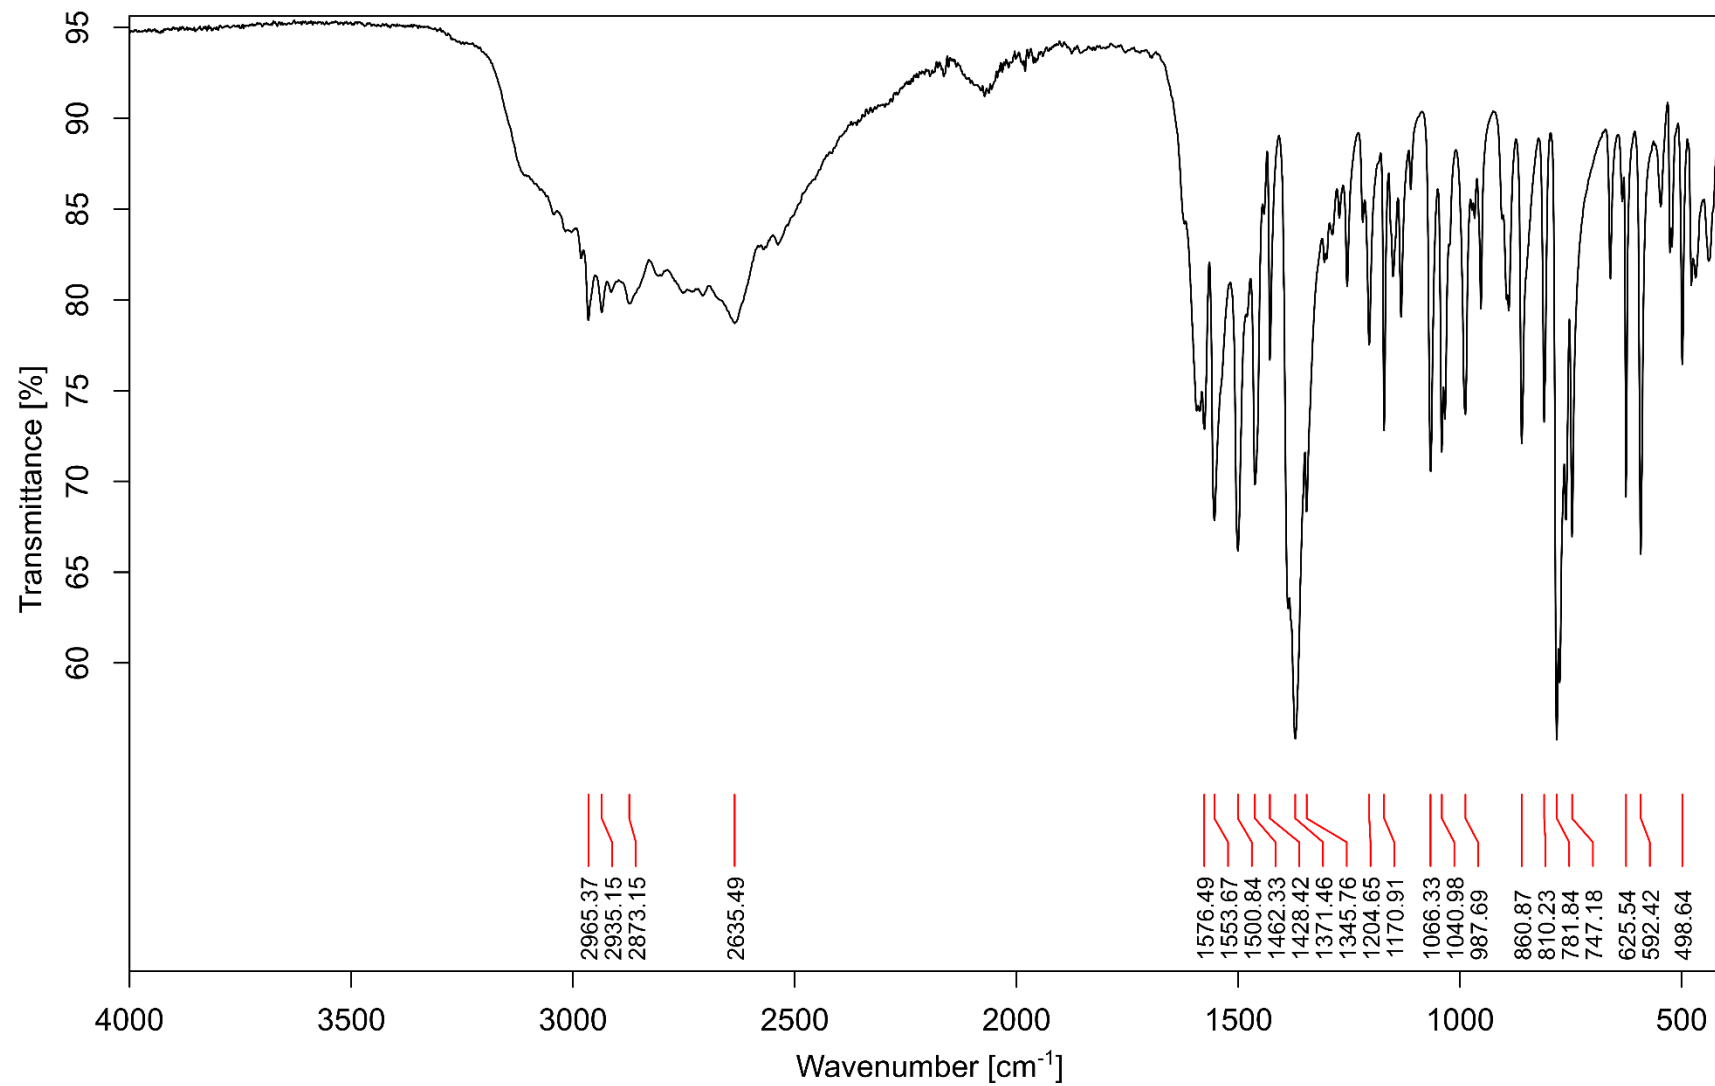

**Figure S9.** IR spectrum of the **2b** polymorph.

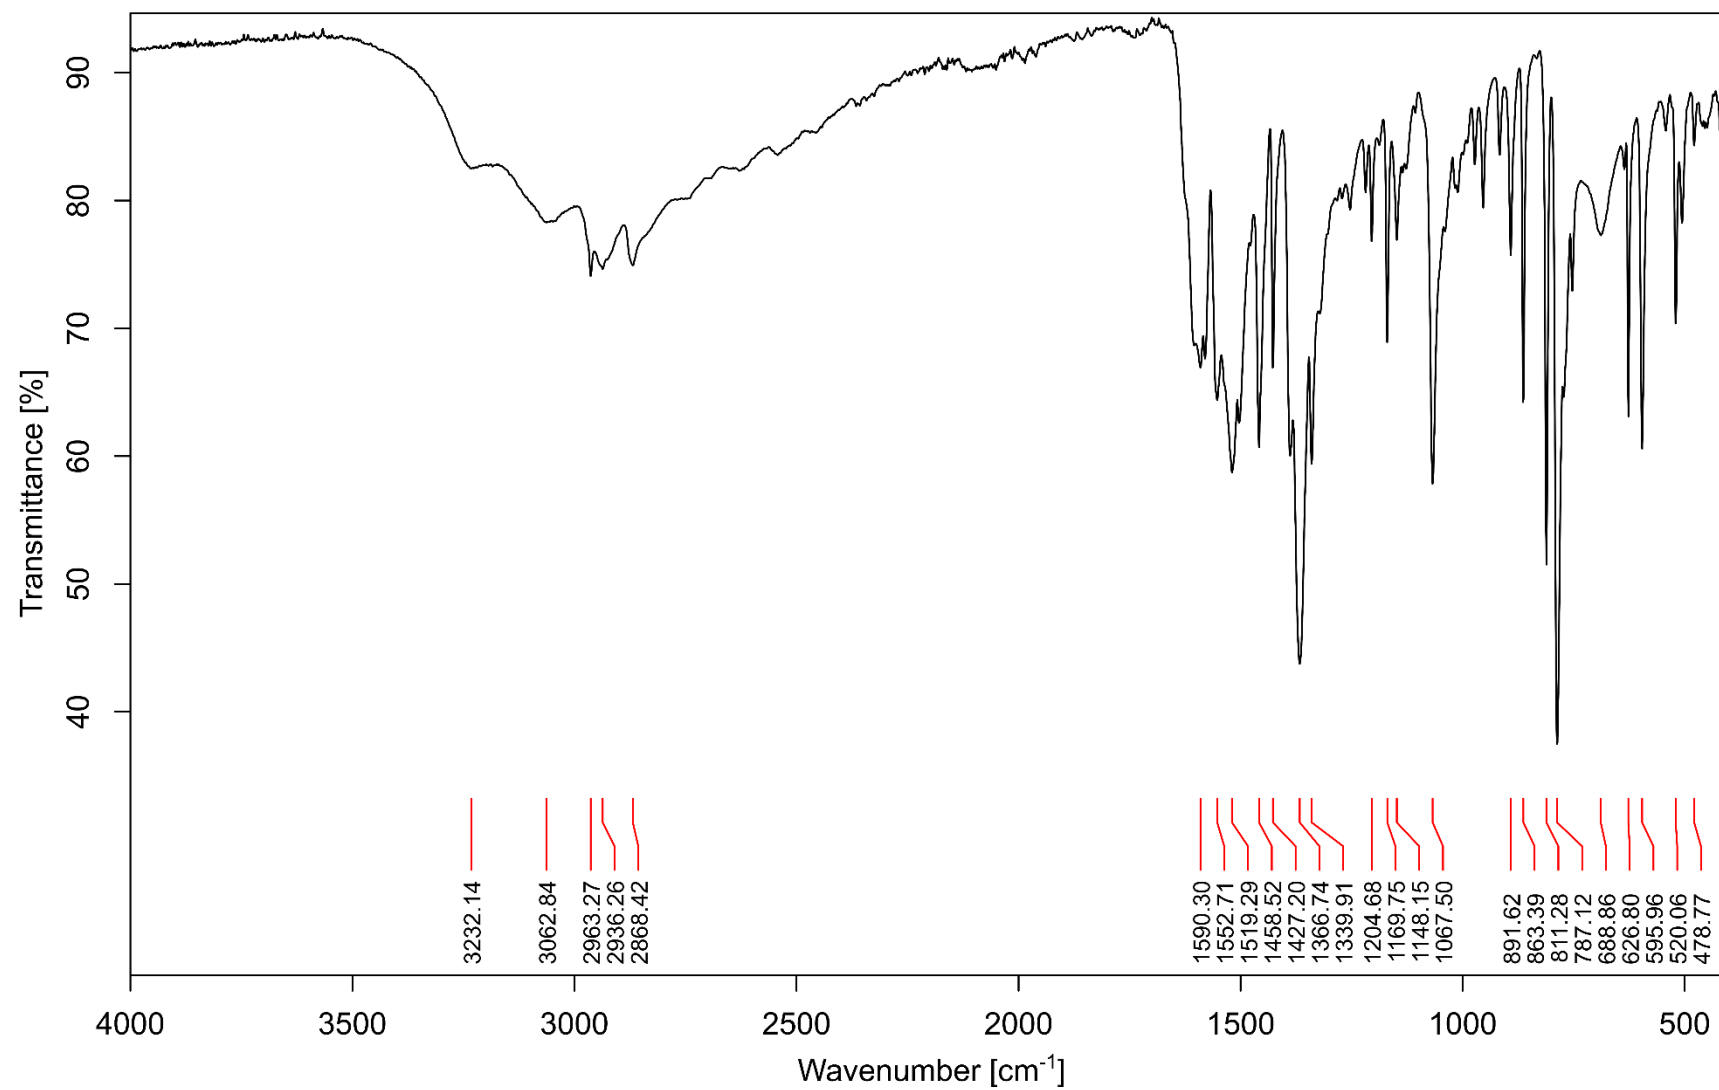

**Figure S10.** IR spectrum of the **3a** polymorph.

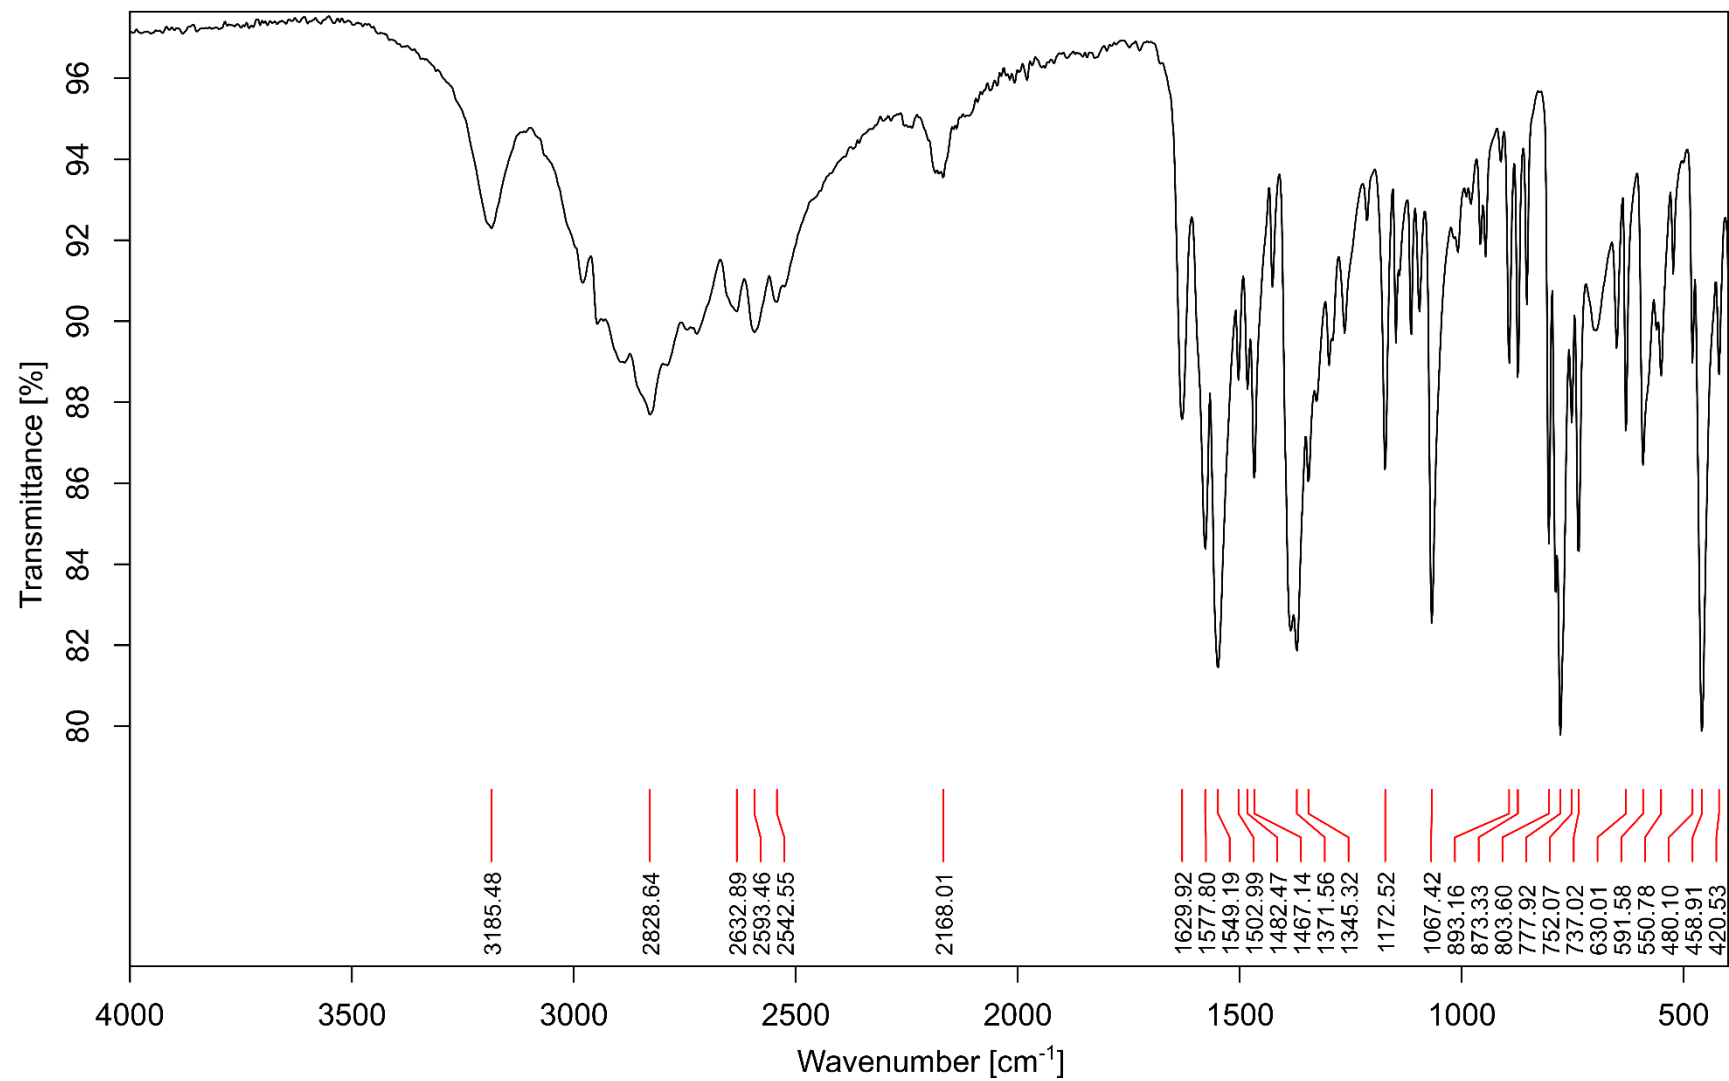

**Figure S11.** IR spectrum of the **3b** polymorph.

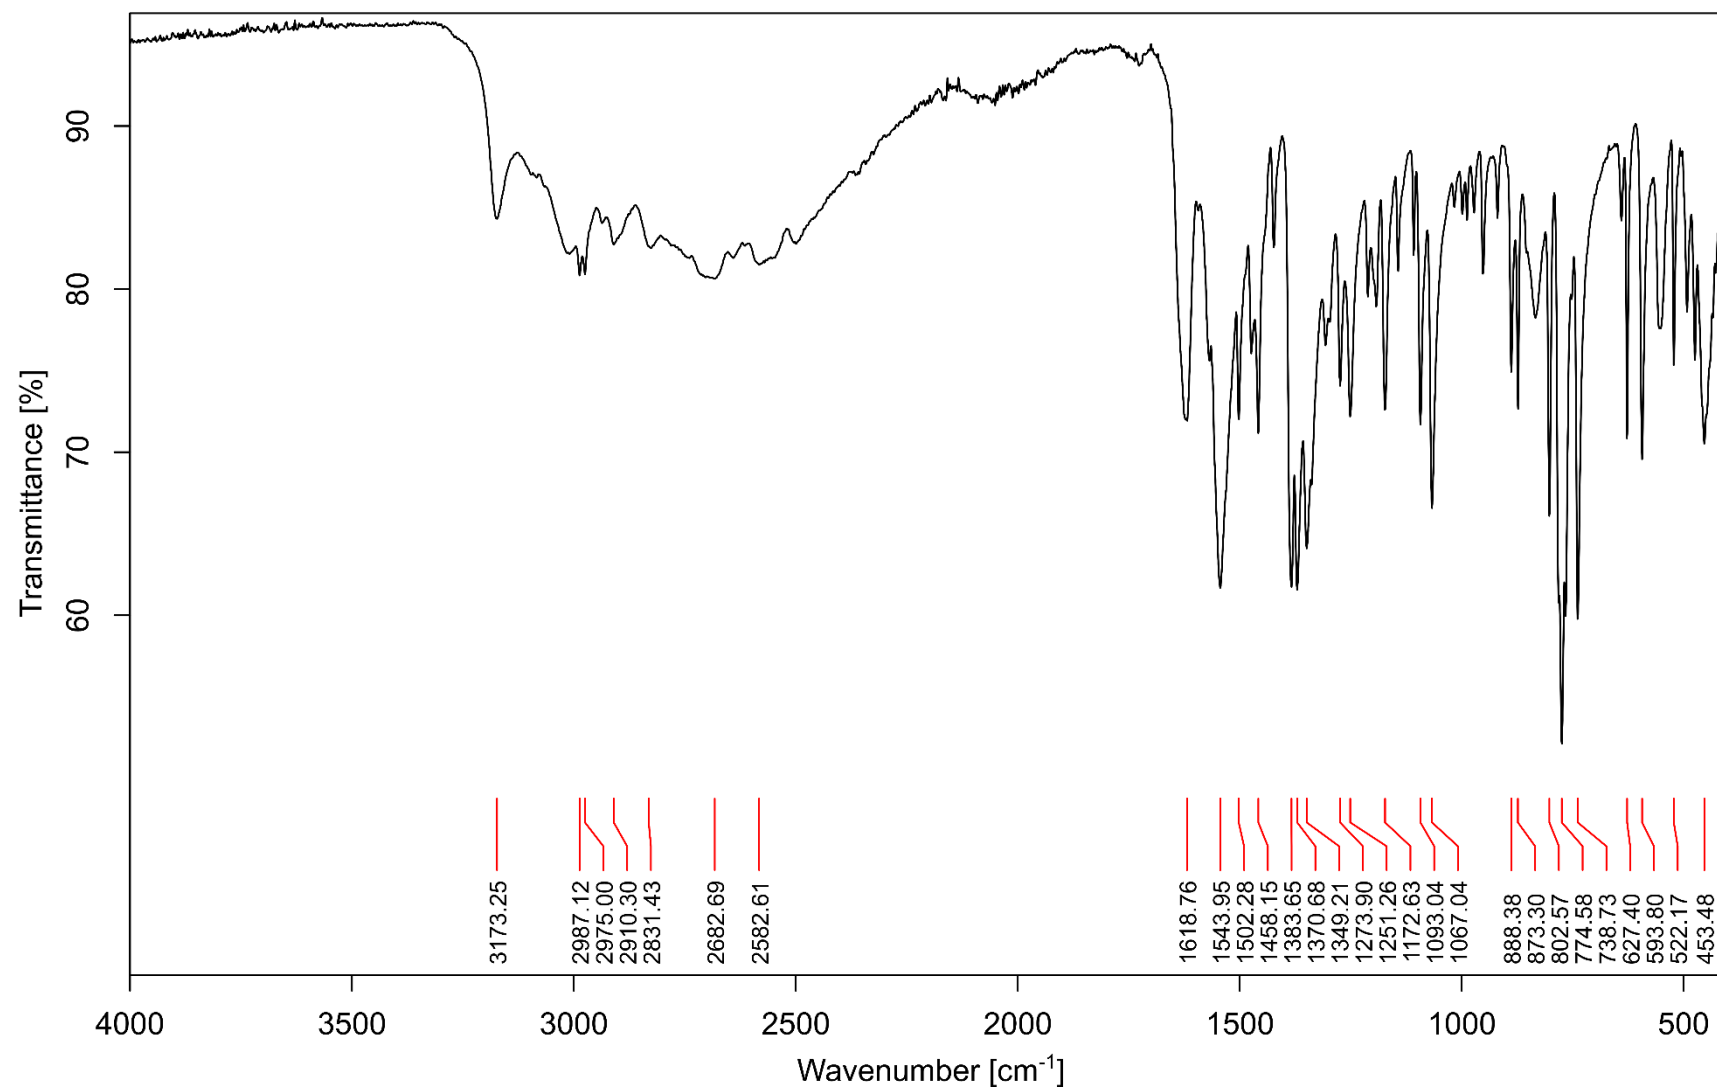

#### 4. $^1\text{H}$ NMR spectra

Figure S12.  $^1\text{H}$  NMR spectrum of **1** in  $\text{DMSO}-d_6$ .

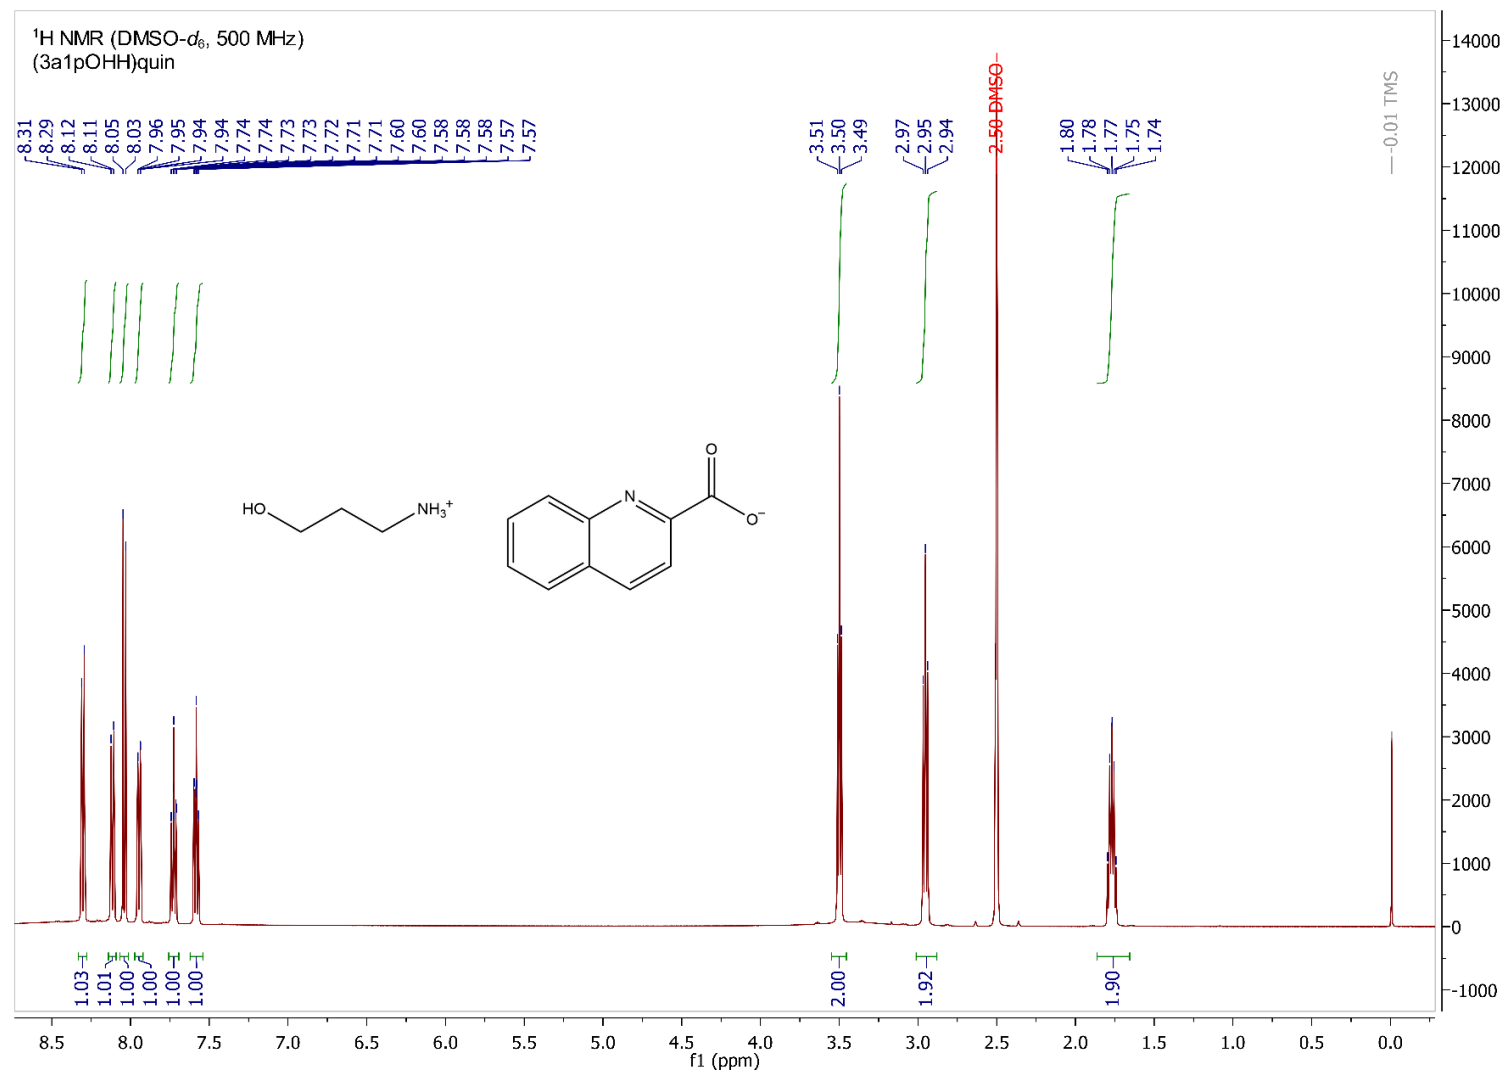

**Figure S13.**  $^1\text{H}$  NMR spectrum of **2** in  $\text{DMSO-}d_6$ .

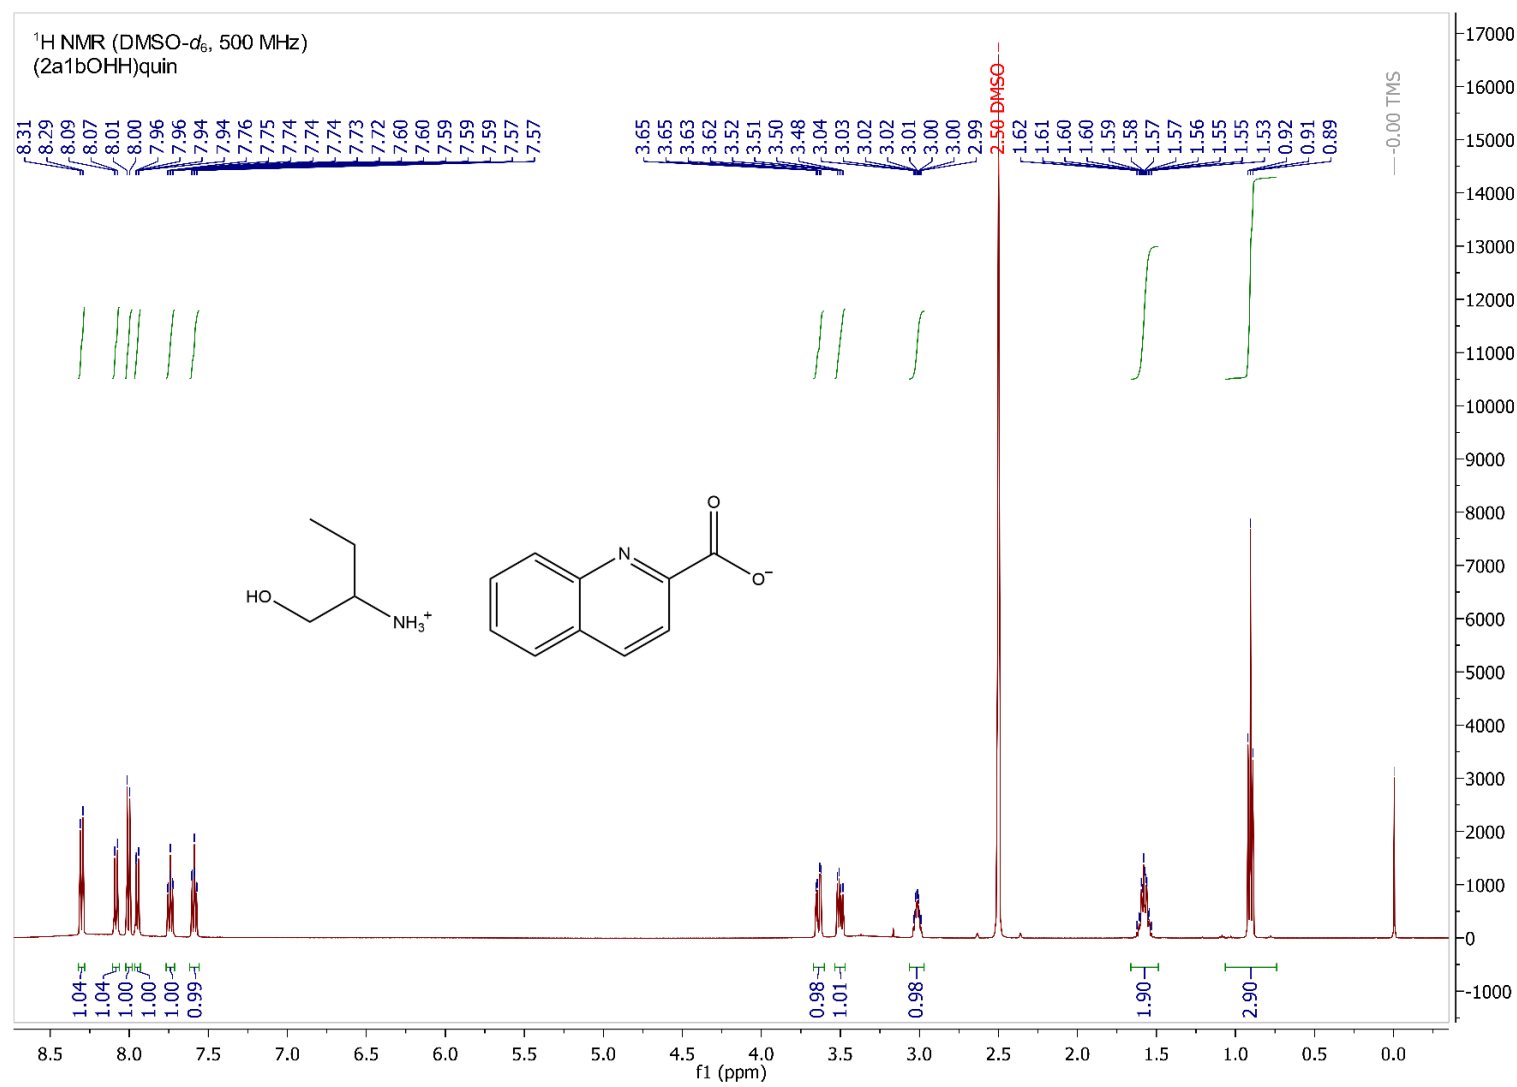

**Figure S14.**  $^1\text{H}$  NMR spectrum of **3** in  $\text{DMSO-}d_6$ .

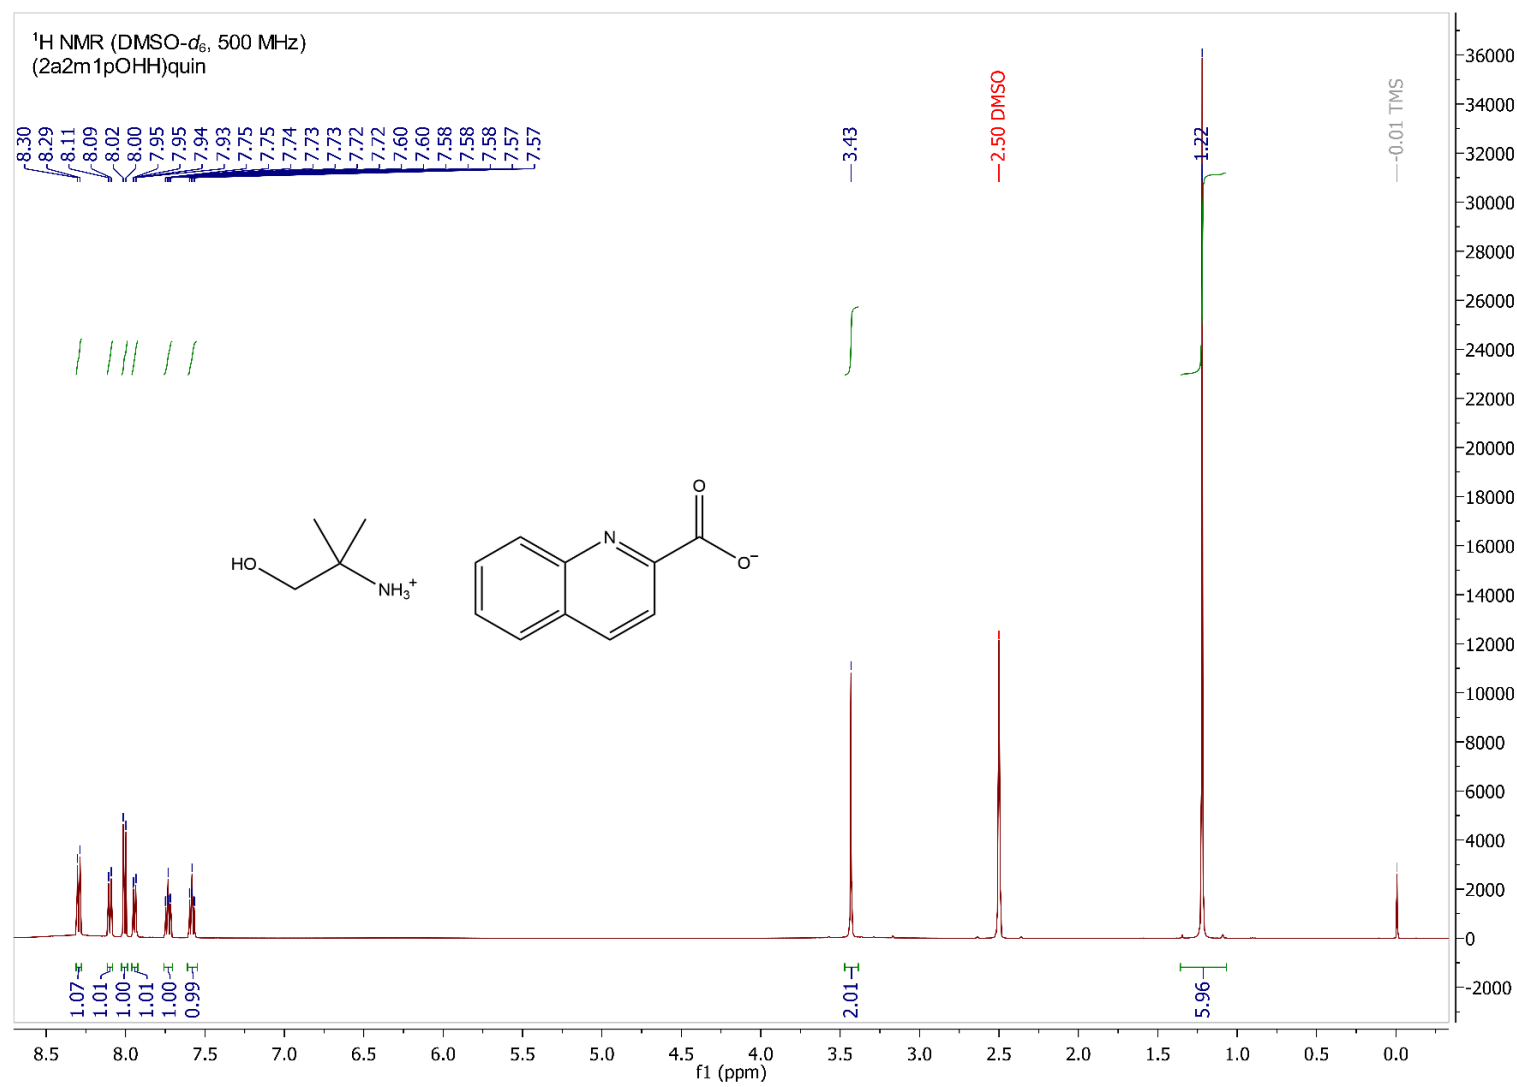



## 5. TG/DSC curves.

Figure S15. TG and DSC curves for **1**.

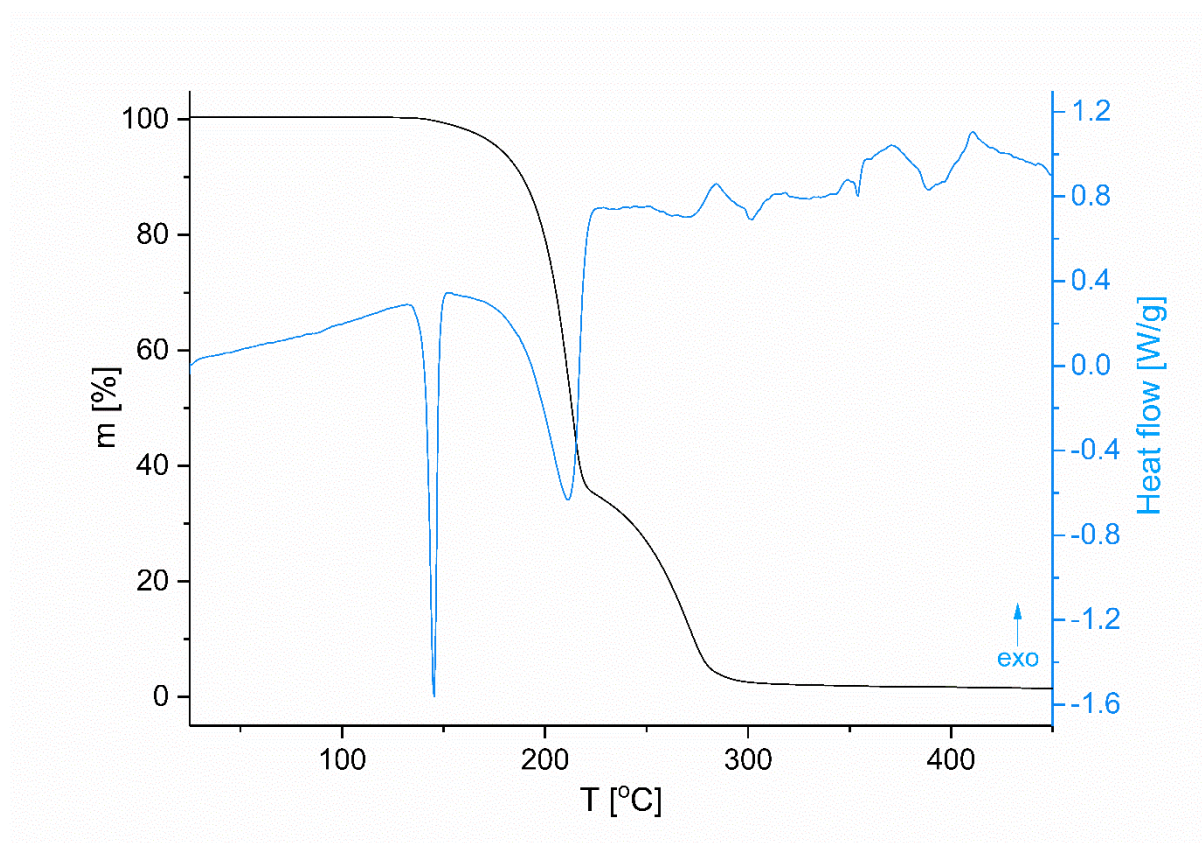

**Figure S16.** TG and DSC curves for **2b**.

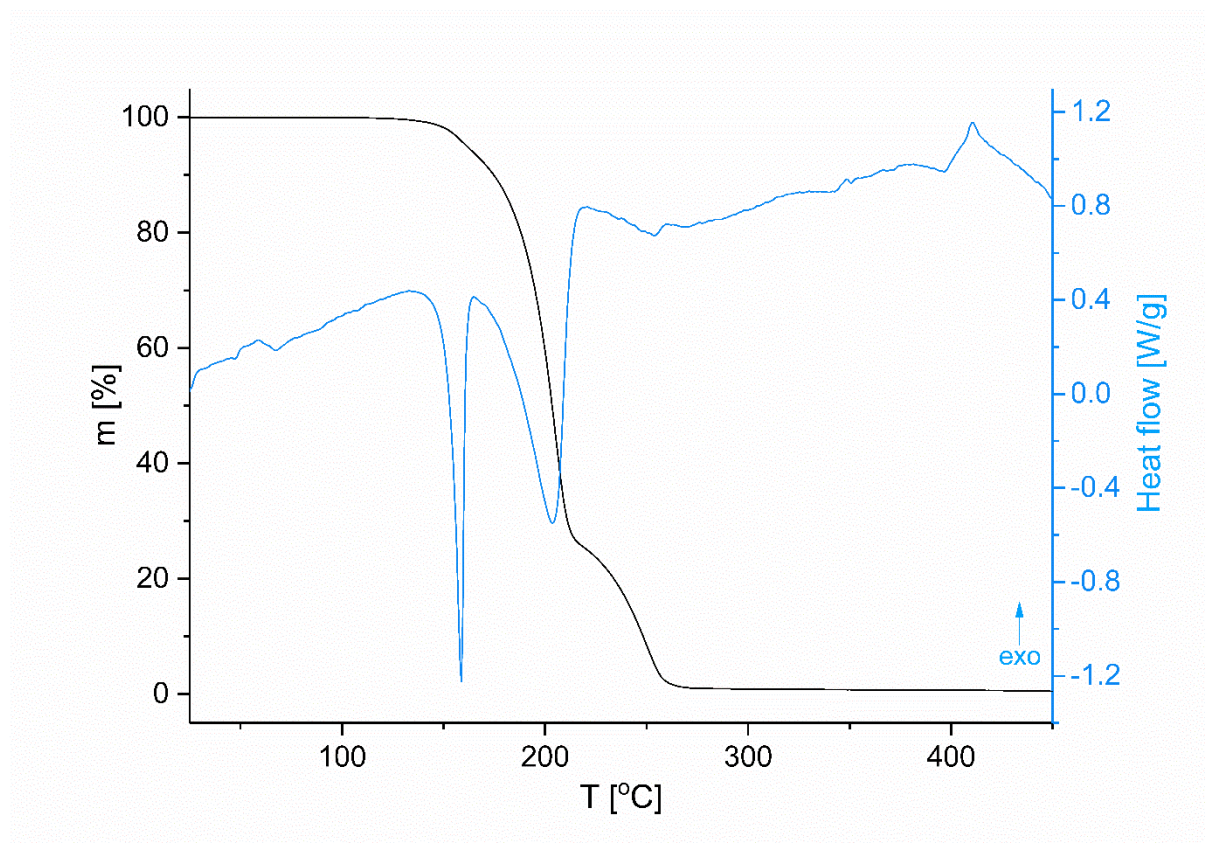

**Figure S17.** TG and DSC curves for **3b**.

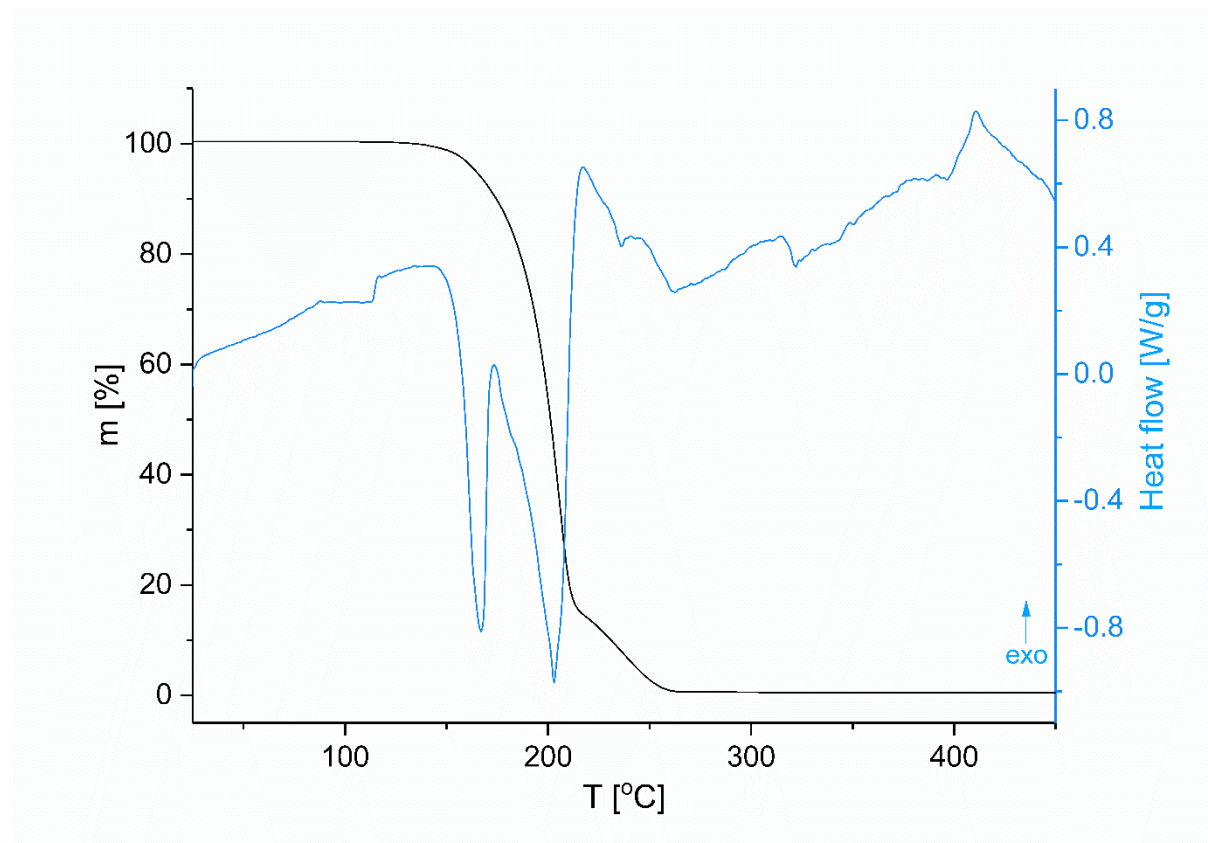

Supplement: s1 [file s1]
